# Supplementary material for: Experimental Characterization of Inkjet-Printed Stretchable Circuits for Wearable Sensor Applications
Source: MDPI journal article supplement (doi:10.3390/s18103476), 2018-10-16
Supplement: s1 [file s1]

# Supplementary Materials

## Experimental Characterization of Inkjet-Printed Stretchable Circuits for Wearable Sensor Applications

Jumana Abu-Khalaf <sup>1,\*</sup>, Razan Saraireh <sup>2</sup>, Saleh Eisa <sup>2</sup>, and Alaaldeen Al-Halhouli <sup>1</sup>

<sup>1</sup> Department of Mechatronics Engineering/NanoLab, School of Applied Technical Sciences, German Jordanian University, Amman, Jordan; [jumana.abukhalaf@gu.edu.jo](mailto:jumana.abukhalaf@gu.edu.jo); [alaaldeen.alhalhouli@gu.edu.jo](mailto:alaaldeen.alhalhouli@gu.edu.jo)

<sup>2</sup> Department of Electronics & Communications Engineering, Arab Academy for Science, Technology and Maritime Transport, Cairo, Egypt; [rsarayrah@student.aast.edu](mailto:rsarayrah@student.aast.edu); [saleheisa@aaast.edu](mailto:saleheisa@aaast.edu)

\* Correspondence: [jumana.abukhalaf@gu.edu.jo](mailto:jumana.abukhalaf@gu.edu.jo); Tel.: +962-799-213713

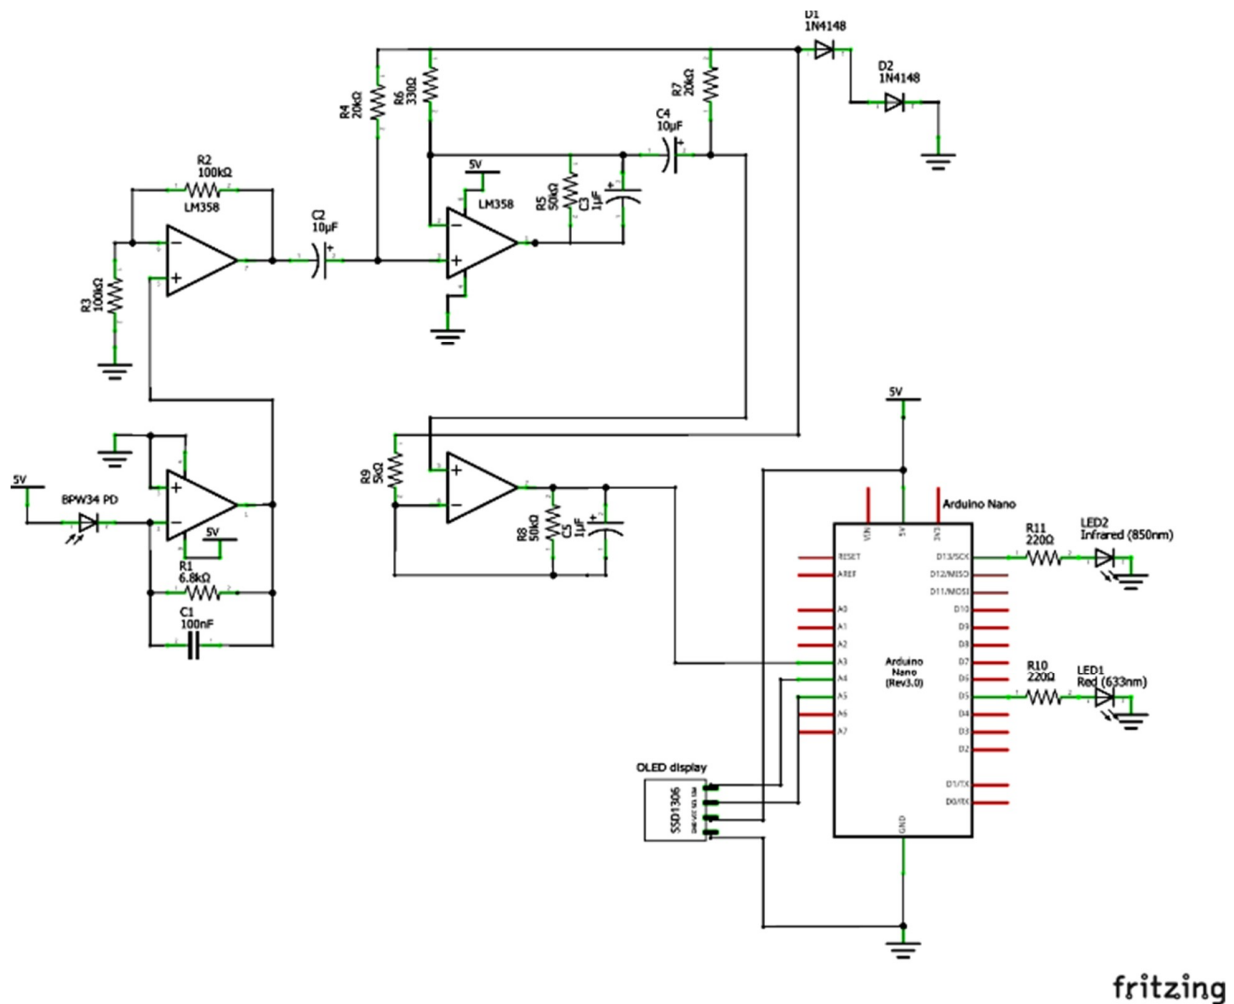

Figure S1: External circuitry for pulse oximeter
